# Supplementary material for: Bta-miR-2400 Targets SUMO1 to Affect Yak Preadipocytes Proliferation and Differentiation
Source: MDPI journal article supplement (doi:10.3390/biology10100949), 2021-09-22
Supplement: s1 [file s1]

**Table S1.** Primers for the dual-luciferase reporter assay. F: forward, R: reverse.

| Name            | Primer sequence (5' to 3')                            |
|-----------------|-------------------------------------------------------|
| <i>SUMO1-WT</i> | F1:CTAGTTGTTTAAACGAGCTCGCTAGCTGTAATGTGGTGTTCAAAAC     |
|                 | ATAATTGAAACTG                                         |
|                 | R1:GAATTCAAATTACCAGATGTTTTAAAGAGATGGGGTGCCAGTTTC      |
|                 | AATTATGTTT                                            |
| <i>SUMO1-WT</i> | F2:TCTGGTAATTTGAATTCTAGTGCCCATTTATTCAATTATTGTTTCTTTTC |
|                 | ATTGTGC                                               |
|                 | R2:TGATATGAAGGGGGCTGAGGTTTGATCACCAAAAATCAGCACAAAT     |
|                 | GAAAAGAAAC                                            |
| <i>SUMO1-WT</i> | F3:CAGCCCCCTTCATATCACTCTCTCCTTTTTAAAAATTACATGTGTGC    |
|                 | ATAGAGAG                                              |
|                 | R3:GCCTGCAGGTCGACTCTAGACTCGAGCCTGGAAAAGGCGGGCTCT      |
|                 | CTATGCACACATG                                         |
| <i>SUMO1-MT</i> | F1:CTAGTTGTTTAAACGAGCTCGCTAGCTGTAATGTGGTGTTCAAAAC     |
|                 | ATAATTGAAACTG                                         |
|                 | R1:GAATTCAAATTACCAGATGTTTTAAAGAGATGGGGTGCCAGTTTC      |
|                 | AATTATGTTT                                            |
| <i>SUMO1-MT</i> | F2:TCTGGTAATTTGAATTCTAGTGCCCATTTATTCATTTAACAAAGAAA    |
|                 | AGTAACACG                                             |
|                 | R2:TGATATGAAGGGGGCTGAGGTTTGATCACCAAAAACGTCGTGTTA      |
|                 | CTTTTCTTTG                                            |
| <i>SUMO1-MT</i> | F3:CAGCCCCCTTCATATCACTCTCTCCTTTTTAAAAATTACATGTGTGC    |
|                 | ATAGAGAG                                              |
|                 | R3:GCCTGCAGGTCGACTCTAGACTCGAGCCTGGAAAAGGCGGGCTCT      |
|                 | CTATGCACACATG                                         |
