# Supplementary material for: Bta-miR-2400 Targets SUMO1 to Affect Yak Preadipocytes Proliferation and Differentiation
Source: MDPI journal article supplement (doi:10.3390/biology10100949), 2021-09-22
Supplement: s1 [file s1]

Actin

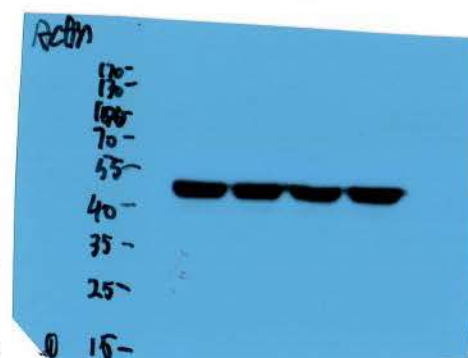

Mimic  
Mimic NC  
Inhibitor  
Inhibitor NC

PPAR $\gamma$

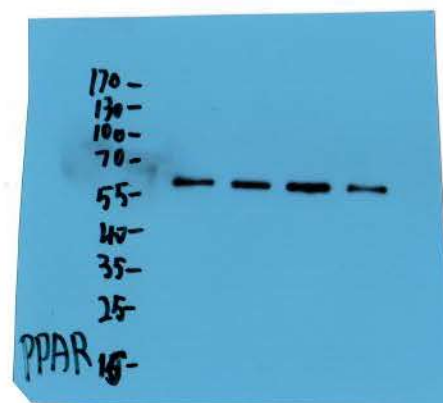

Mimic  
Mimic NC  
Inhibitor  
Inhibitor NC

SUMO1

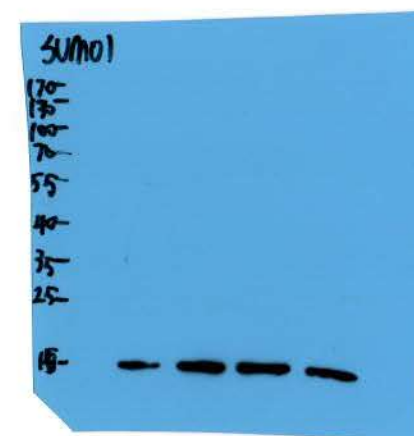

Mimic  
Mimic NC  
Inhibitor  
Inhibitor NC
